# Supplementary material for: Identification of a Multi–Long Noncoding RNA Signature for the Diagnosis of Type 1 Diabetes Mellitus
Source: Front Bioeng Biotechnol. 2020 Jul 3;8:553. doi: 10.3389/fbioe.2020.00553 (PMC7350420; doi:10.3389/fbioe.2020.00553)
Supplement: Supplementary file 4 [file Table_4.XLSX]

## Sheet: Sheet1
Category	Term	Count	%	P-Value	Benjamin
GOTERM_BP_ALL	cellular response to stimulus	404	44.2	1.2e-07	0.0008
GOTERM_BP_ALL	positive regulation of cellular process	293	32	2.2e-07	0.00073
GOTERM_BP_ALL	cellular response to chemical stimulus	181	19.8	2.8e-07	0.00063
GOTERM_BP_ALL	response to stimulus	469	51.3	3.2e-07	0.00054
GOTERM_BP_ALL	regulation of response to stimulus	234	25.6	3.5e-07	0.00046
GOTERM_BP_ALL	defense response	116	12.7	4e-07	0.00045
GOTERM_BP_ALL	negative regulation of biological process	284	31	6.7e-07	0.00064
GOTERM_BP_ALL	positive regulation of biological process	317	34.6	8.9e-07	0.00075
GOTERM_BP_ALL	cell communication	365	39.9	1.6e-06	0.0012
GOTERM_BP_ALL	response to stress	232	25.4	1.9e-06	0.0013
GOTERM_BP_ALL	single organism signaling	361	39.5	2e-06	0.0012
GOTERM_BP_ALL	movement of cell or subcellular component	129	14.1	2.1e-06	0.0012
GOTERM_BP_ALL	signaling	363	39.7	2.4e-06	0.0012
GOTERM_BP_ALL	response to external stimulus	144	15.7	3e-06	0.0015
GOTERM_BP_ALL	signal transduction	338	36.9	3.2e-06	0.0014
GOTERM_BP_ALL	localization of cell	101	11	3.4e-06	0.0014
GOTERM_BP_ALL	cell motility	101	11	3.4e-06	0.0014
GOTERM_BP_ALL	regulation of biological process	582	63.6	4.6e-06	0.0018
GOTERM_BP_ALL	inflammatory response	57	6.2	8.2e-06	0.0031
GOTERM_BP_ALL	locomotion	111	12.1	8.6e-06	0.003
GOTERM_BP_ALL	regulation of localization	163	17.8	1.2e-05	0.0039
GOTERM_BP_ALL	response to chemical	250	27.3	1.3e-05	0.004
GOTERM_BP_ALL	cell migration	90	9.8	1.3e-05	0.0038
GOTERM_BP_ALL	regulation of defense response	58	6.3	2.3e-05	0.0067
GOTERM_BP_ALL	response to organic substance	180	19.7	2.5e-05	0.007
GOTERM_BP_ALL	regulation of signaling	193	21.1	2.7e-05	0.0071
GOTERM_BP_ALL	single-multicellular organism process	340	37.2	2.8e-05	0.0071
GOTERM_BP_ALL	regulation of immune response	72	7.9	3.3e-05	0.0083
GOTERM_BP_ALL	single-organism cellular process	636	69.5	3.6e-05	0.0085
GOTERM_BP_ALL	regulation of signal transduction	174	19	3.7e-05	0.0085
GOTERM_BP_ALL	regulation of cell motility	61	6.7	3.7e-05	0.0083
GOTERM_BP_ALL	regulation of locomotion	63	6.9	3.8e-05	0.0082
GOTERM_BP_ALL	regulation of cellular component movement	65	7.1	4e-05	0.0084
GOTERM_BP_ALL	regulation of anatomical structure morphogenesis	80	8.7	4.2e-05	0.0084
GOTERM_BP_ALL	innate immune response	67	7.3	4.4e-05	0.0086
GOTERM_BP_ALL	regulation of developmental process	141	15.4	4.6e-05	0.0088
GOTERM_BP_ALL	multicellular organism development	284	31	6.1e-05	0.011
GOTERM_BP_ALL	single-organism process	683	74.6	7.3e-05	0.013
GOTERM_BP_ALL	regulation of response to external stimulus	59	6.4	7.4e-05	0.013
GOTERM_BP_ALL	regulation of catalytic activity	152	16.6	7.9e-05	0.014
GOTERM_BP_ALL	single-organism developmental process	313	34.2	8.7e-05	0.014
GOTERM_BP_ALL	system development	253	27.7	8.9e-05	0.014
GOTERM_BP_ALL	regulation of cell communication	187	20.4	9e-05	0.014
GOTERM_BP_ALL	negative regulation of cellular process	253	27.7	0.00011	0.016
GOTERM_BP_ALL	regulation of cell migration	56	6.1	0.00012	0.018
GOTERM_BP_ALL	animal organ development	192	21	0.00012	0.018
GOTERM_BP_ALL	negative regulation of multicellular organismal process	76	8.3	0.00012	0.017
GOTERM_BP_ALL	regulation of multicellular organismal process	167	18.3	0.00013	0.018
GOTERM_BP_ALL	response to cytokine	63	6.9	0.00013	0.018
GOTERM_BP_ALL	mesenchymal cell development	21	2.3	0.00015	0.02
GOTERM_BP_ALL	mesenchyme development	26	2.8	0.00015	0.02
GOTERM_BP_ALL	immune response	106	11.6	0.00016	0.021
GOTERM_BP_ALL	lymphocyte proliferation	28	3.1	0.00016	0.021
GOTERM_BP_ALL	response to cadmium ion	10	1.1	0.00016	0.021
GOTERM_BP_ALL	regulation of cellular process	551	60.2	0.00018	0.022
GOTERM_BP_ALL	regulation of cell morphogenesis	48	5.2	0.00018	0.022
GOTERM_BP_ALL	mononuclear cell proliferation	28	3.1	0.00018	0.022
GOTERM_BP_ALL	cellular response to zinc ion	7	0.8	0.00019	0.022
GOTERM_BP_ALL	developmental process	318	34.8	0.0002	0.022
GOTERM_BP_ALL	biological regulation	599	65.5	0.00021	0.023
GOTERM_BP_ALL	negative regulation of developmental process	58	6.3	0.00025	0.028
GOTERM_BP_ALL	T cell proliferation	21	2.3	0.00026	0.028
GOTERM_BP_ALL	regulation of multicellular organismal development	114	12.5	0.00028	0.03
GOTERM_BP_ALL	leukocyte migration	35	3.8	0.00029	0.03
GOTERM_BP_ALL	single organism cell adhesion	60	6.6	0.00032	0.033
GOTERM_BP_ALL	regulation of T cell proliferation	19	2.1	0.00033	0.033
GOTERM_BP_ALL	regulation of molecular function	175	19.1	0.00034	0.034
GOTERM_BP_ALL	mesenchymal cell differentiation	21	2.3	0.00035	0.034
GOTERM_BP_ALL	anatomical structure development	308	33.7	0.00035	0.034
GOTERM_BP_ALL	regulation of cellular component organization	146	16	0.00037	0.035
GOTERM_BP_ALL	positive regulation of immune response	54	5.9	0.00038	0.035
GOTERM_BP_ALL	leukocyte proliferation	28	3.1	0.00044	0.041
GOTERM_BP_ALL	positive regulation of metabolic process	184	20.1	0.00044	0.04
GOTERM_BP_ALL	cellular response to organic substance	138	15.1	0.00047	0.042
GOTERM_BP_ALL	single organismal cell-cell adhesion	56	6.1	0.00049	0.044
GOTERM_BP_ALL	multicellular organismal process	383	41.9	0.00051	0.044
GOTERM_BP_ALL	negative regulation of response to stimulus	93	10.2	0.00054	0.046
GOTERM_BP_ALL	regulation of lymphocyte proliferation	22	2.4	0.00054	0.046
GOTERM_BP_ALL	positive regulation of macromolecule metabolic process	173	18.9	0.00055	0.046
GOTERM_BP_ALL	regulation of mononuclear cell proliferation	22	2.4	0.00058	0.048
GOTERM_BP_ALL	regulation of transport	116	12.7	0.00066	0.054
GOTERM_BP_ALL	positive regulation of catalytic activity	103	11.3	0.00068	0.055
GOTERM_BP_ALL	cytokine-mediated signaling pathway	45	4.9	0.00071	0.056
GOTERM_BP_ALL	antigen processing and presentation of exogenous peptide antigen via MHC class I, TAP-dependent	11	1.2	0.00076	0.06
GOTERM_BP_ALL	cellular response to cytokine stimulus	54	5.9	0.00078	0.061
GOTERM_BP_ALL	regulation of cell morphogenesis involved in differentiation	31	3.4	0.00092	0.07
GOTERM_BP_ALL	negative regulation of epithelial to mesenchymal transition	7	0.8	0.00096	0.072
GOTERM_BP_ALL	positive regulation of defense response	35	3.8	0.00096	0.071
GOTERM_BP_ALL	regulation of biological quality	207	22.6	0.00098	0.072
GOTERM_BP_ALL	regulation of immune system process	92	10.1	0.00099	0.072
GOTERM_BP_ALL	regulation of leukocyte proliferation	22	2.4	0.001	0.074
GOTERM_BP_ALL	antigen processing and presentation of exogenous peptide antigen via MHC class I	11	1.2	0.0011	0.078
GOTERM_BP_ALL	phosphorus metabolic process	183	20	0.0011	0.078
GOTERM_BP_ALL	positive regulation of response to stimulus	127	13.9	0.0012	0.082
GOTERM_BP_ALL	negative regulation of growth	24	2.6	0.0012	0.084
GOTERM_BP_ALL	antigen processing and presentation of peptide antigen via MHC class I	13	1.4	0.0014	0.096
GOTERM_BP_ALL	positive regulation of cellular metabolic process	169	18.5	0.0014	0.096
GOTERM_BP_ALL	wound healing	43	4.7	0.0015	0.098
GOTERM_BP_ALL	small molecule metabolic process	122	13.3	0.0015	0.098
GOTERM_BP_ALL	T cell activation	37	4	0.0016	0.1
GOTERM_BP_ALL	T cell aggregation	37	4	0.0016	0.1
GOTERM_BP_ALL	semaphorin-plexin signaling pathway	8	0.9	0.0016	0.1
GOTERM_BP_ALL	lymphocyte aggregation	37	4	0.0016	0.1
GOTERM_BP_ALL	organ morphogenesis	69	7.5	0.0018	0.11
GOTERM_BP_ALL	response to wounding	49	5.4	0.0018	0.11
GOTERM_BP_ALL	phosphate-containing compound metabolic process	181	19.8	0.0018	0.11
GOTERM_BP_ALL	positive regulation of immune system process	67	7.3	0.0019	0.11
GOTERM_BP_ALL	response to interferon-gamma	18	2	0.0019	0.11
GOTERM_BP_ALL	regulation of cell-cell adhesion	33	3.6	0.0019	0.11
GOTERM_BP_ALL	anatomical structure morphogenesis	157	17.2	0.0021	0.12
GOTERM_BP_ALL	leukocyte aggregation	37	4	0.0021	0.12
GOTERM_BP_ALL	regulation of cellular component biogenesis	58	6.3	0.0022	0.12
GOTERM_BP_ALL	immune effector process	54	5.9	0.0023	0.13
GOTERM_BP_ALL	immune system process	148	16.2	0.0023	0.13
GOTERM_BP_ALL	negative regulation of response to external stimulus	25	2.7	0.0023	0.13
GOTERM_BP_ALL	antigen processing and presentation of peptide antigen	19	2.1	0.0024	0.13
GOTERM_BP_ALL	leukocyte cell-cell adhesion	39	4.3	0.0025	0.14
GOTERM_BP_ALL	regulation of transferase activity	66	7.2	0.0025	0.14
GOTERM_BP_ALL	respiratory tube development	19	2.1	0.0025	0.14
GOTERM_BP_ALL	tissue development	110	12	0.0026	0.14
GOTERM_BP_ALL	regulation of cell adhesion	48	5.2	0.0026	0.14
GOTERM_BP_ALL	cell surface receptor signaling pathway	158	17.3	0.0027	0.14
GOTERM_BP_ALL	T cell receptor signaling pathway	18	2	0.0027	0.14
GOTERM_BP_ALL	cellular developmental process	226	24.7	0.0027	0.14
GOTERM_BP_ALL	regulation of protein complex assembly	32	3.5	0.0029	0.14
GOTERM_BP_ALL	regulation of response to stress	84	9.2	0.003	0.15
GOTERM_BP_ALL	tube development	44	4.8	0.003	0.15
GOTERM_BP_ALL	negative regulation of locomotion	24	2.6	0.0031	0.15
GOTERM_BP_ALL	regulation of defense response to virus by host	7	0.8	0.0031	0.15
GOTERM_BP_ALL	intracellular signal transduction	157	17.2	0.0031	0.15
GOTERM_BP_ALL	positive regulation of molecular function	114	12.5	0.0031	0.15
GOTERM_BP_ALL	cell differentiation	208	22.7	0.0033	0.16
GOTERM_BP_ALL	positive regulation of protein metabolic process	96	10.5	0.0033	0.16
GOTERM_BP_ALL	negative regulation of cellular component movement	24	2.6	0.0033	0.15
GOTERM_BP_ALL	positive regulation of defense response to virus by host	6	0.7	0.0033	0.15
GOTERM_BP_ALL	viral process	66	7.2	0.0033	0.15
GOTERM_BP_ALL	defense response to virus	22	2.4	0.0034	0.15
GOTERM_BP_ALL	cell-cell adhesion	77	8.4	0.0034	0.16
GOTERM_BP_ALL	chemotaxis	42	4.6	0.0036	0.16
GOTERM_BP_ALL	positive regulation of cellular component movement	34	3.7	0.0037	0.16
GOTERM_BP_ALL	taxis	42	4.6	0.0037	0.16
GOTERM_BP_ALL	regulation of body fluid levels	39	4.3	0.0038	0.16
GOTERM_BP_ALL	multi-organism cellular process	66	7.2	0.0039	0.17
GOTERM_BP_ALL	neural crest cell differentiation	11	1.2	0.004	0.17
GOTERM_BP_ALL	positive regulation of transferase activity	47	5.1	0.004	0.17
GOTERM_BP_ALL	positive regulation of locomotion	34	3.7	0.004	0.17
GOTERM_BP_ALL	epithelial to mesenchymal transition	13	1.4	0.0041	0.17
GOTERM_BP_ALL	blood coagulation	29	3.2	0.0041	0.17
GOTERM_BP_ALL	coagulation	30	3.3	0.0041	0.17
GOTERM_BP_ALL	hemostasis	30	3.3	0.0041	0.17
GOTERM_BP_ALL	positive regulation of proteolysis	30	3.3	0.0041	0.17
GOTERM_BP_ALL	response to virus	27	3	0.0043	0.18
GOTERM_BP_ALL	vitamin metabolic process	15	1.6	0.0043	0.18
GOTERM_BP_ALL	positive regulation of cell motility	33	3.6	0.0045	0.18
GOTERM_BP_ALL	negative regulation of cell morphogenesis involved in differentiation	14	1.5	0.0046	0.18
GOTERM_BP_ALL	negative regulation of catalytic activity	58	6.3	0.0046	0.18
GOTERM_BP_ALL	cellular response to metal ion	15	1.6	0.0046	0.18
GOTERM_BP_ALL	lung development	18	2	0.0047	0.19
GOTERM_BP_ALL	regulation of inflammatory response	27	3	0.0047	0.19
GOTERM_BP_ALL	negative regulation of signal transduction	72	7.9	0.0048	0.19
GOTERM_BP_ALL	regulation of tissue remodeling	10	1.1	0.0049	0.19
GOTERM_BP_ALL	positive regulation of cellular protein metabolic process	90	9.8	0.005	0.19
GOTERM_BP_ALL	positive regulation of catabolic process	28	3.1	0.0054	0.2
GOTERM_BP_ALL	bone resorption	8	0.9	0.0059	0.22
GOTERM_BP_ALL	neural crest cell development	10	1.1	0.006	0.22
GOTERM_BP_ALL	regulation of epithelial to mesenchymal transition	10	1.1	0.006	0.22
GOTERM_BP_ALL	regulation of protein metabolic process	147	16.1	0.0061	0.22
GOTERM_BP_ALL	regulation of proteolysis	50	5.5	0.0061	0.22
GOTERM_BP_ALL	localization	316	34.5	0.0061	0.22
GOTERM_BP_ALL	positive regulation of signaling	97	10.6	0.0062	0.22
GOTERM_BP_ALL	antigen processing and presentation	21	2.3	0.0064	0.23
GOTERM_BP_ALL	regulation of cellular localization	57	6.2	0.0065	0.23
GOTERM_BP_ALL	leukocyte activation involved in immune response	20	2.2	0.0065	0.23
GOTERM_BP_ALL	regulation of cell projection organization	42	4.6	0.0066	0.23
GOTERM_BP_ALL	regulation of axon extension involved in axon guidance	7	0.8	0.0067	0.23
GOTERM_BP_ALL	negative regulation of cellular metabolic process	138	15.1	0.0067	0.23
GOTERM_BP_ALL	cell adhesion	104	11.4	0.0069	0.24
GOTERM_BP_ALL	interspecies interaction between organisms	66	7.2	0.007	0.24
GOTERM_BP_ALL	symbiosis, encompassing mutualism through parasitism	66	7.2	0.007	0.24
GOTERM_BP_ALL	positive regulation of innate immune response	25	2.7	0.0072	0.24
GOTERM_BP_ALL	cell activation involved in immune response	20	2.2	0.0072	0.24
GOTERM_BP_ALL	antigen processing and presentation of exogenous antigen	17	1.9	0.0072	0.24
GOTERM_BP_ALL	positive regulation of cellular component organization	76	8.3	0.0073	0.24
GOTERM_BP_ALL	regulation of intracellular protein transport	30	3.3	0.0073	0.24
GOTERM_BP_ALL	regulation of phosphate metabolic process	99	10.8	0.0074	0.24
GOTERM_BP_ALL	regulation of deoxyribonuclease activity	4	0.4	0.0074	0.24
GOTERM_BP_ALL	branchiomotor neuron axon guidance	4	0.4	0.0074	0.24
GOTERM_BP_ALL	positive regulation of peptidase activity	16	1.7	0.0075	0.24
GOTERM_BP_ALL	cellular response to cadmium ion	5	0.5	0.0075	0.24
GOTERM_BP_ALL	regulation of phosphorus metabolic process	99	10.8	0.0076	0.24
GOTERM_BP_ALL	positive regulation of cellular component biogenesis	34	3.7	0.0076	0.24
GOTERM_BP_ALL	biological adhesion	104	11.4	0.0077	0.24
GOTERM_BP_ALL	regulation of T cell apoptotic process	7	0.8	0.0077	0.24
GOTERM_BP_ALL	positive regulation of endopeptidase activity	15	1.6	0.0077	0.24
GOTERM_BP_ALL	regulation of G-protein coupled receptor protein signaling pathway	14	1.5	0.0079	0.24
GOTERM_BP_ALL	regulation of cellular protein localization	41	4.5	0.008	0.25
GOTERM_BP_ALL	regulation of innate immune response	29	3.2	0.0081	0.25
GOTERM_BP_ALL	positive regulation of signal transduction	89	9.7	0.0082	0.25
GOTERM_BP_ALL	positive regulation of activated T cell proliferation	6	0.7	0.0083	0.25
GOTERM_BP_ALL	regulation of hydrolase activity	84	9.2	0.0083	0.25
GOTERM_BP_ALL	T cell apoptotic process	8	0.9	0.0084	0.25
GOTERM_BP_ALL	regulation of mitotic cell cycle phase transition	26	2.8	0.0084	0.25
GOTERM_BP_ALL	aging	24	2.6	0.0084	0.25
GOTERM_BP_ALL	multi-organism process	137	15	0.0085	0.25
GOTERM_BP_ALL	positive regulation of cell migration	31	3.4	0.0087	0.26
GOTERM_BP_ALL	response to other organism	56	6.1	0.0087	0.26
GOTERM_BP_ALL	response to external biotic stimulus	56	6.1	0.0087	0.26
GOTERM_BP_ALL	regulation of cell differentiation	95	10.4	0.0088	0.26
GOTERM_BP_ALL	immune response-regulating signaling pathway	39	4.3	0.009	0.26
GOTERM_BP_ALL	tissue remodeling	15	1.6	0.0092	0.26
GOTERM_BP_ALL	negative regulation of coagulation	8	0.9	0.0093	0.27
GOTERM_BP_ALL	activation of immune response	40	4.4	0.0094	0.27
GOTERM_BP_ALL	cell chemotaxis	22	2.4	0.0094	0.27
GOTERM_BP_ALL	negative regulation of protein metabolic process	68	7.4	0.0094	0.27
GOTERM_BP_ALL	regulation of T cell activation	25	2.7	0.0095	0.26
GOTERM_BP_ALL	cellular homeostasis	56	6.1	0.0096	0.27
GOTERM_BP_ALL	immune response-regulating cell surface receptor signaling pathway	31	3.4	0.0099	0.27
GOTERM_BP_ALL	regulation of activated T cell proliferation	7	0.8	0.01	0.27
GOTERM_BP_ALL	regulation of protein localization	63	6.9	0.01	0.28
GOTERM_BP_ALL	adenosine metabolic process	4	0.4	0.01	0.28
GOTERM_BP_ALL	multicellular organismal homeostasis	26	2.8	0.01	0.28
GOTERM_BP_ALL	nucleobase-containing small molecule metabolic process	50	5.5	0.01	0.27
GOTERM_BP_ALL	positive regulation of ubiquitin-protein transferase activity	12	1.3	0.01	0.27
GOTERM_BP_ALL	positive regulation of cell communication	95	10.4	0.01	0.28
GOTERM_BP_ALL	regulation of ion transport	40	4.4	0.011	0.28
GOTERM_BP_ALL	cell activation	60	6.6	0.011	0.28
GOTERM_BP_ALL	cell proliferation	111	12.1	0.011	0.28
GOTERM_BP_ALL	response to biotic stimulus	58	6.3	0.011	0.28
GOTERM_BP_ALL	regulation of establishment of protein localization	55	6	0.011	0.28
GOTERM_BP_ALL	positive regulation of lymphocyte proliferation	14	1.5	0.011	0.28
GOTERM_BP_ALL	cellular cation homeostasis	41	4.5	0.011	0.28
GOTERM_BP_ALL	positive regulation of nitrogen compound metabolic process	106	11.6	0.011	0.28
GOTERM_BP_ALL	antigen processing and presentation of exogenous peptide antigen	16	1.7	0.011	0.28
GOTERM_BP_ALL	Notch signaling pathway	16	1.7	0.011	0.28
GOTERM_BP_ALL	protein maturation	23	2.5	0.011	0.28
GOTERM_BP_ALL	regulation of axon guidance	7	0.8	0.011	0.28
GOTERM_BP_ALL	positive regulation of gene expression	102	11.1	0.011	0.29
GOTERM_BP_ALL	positive regulation of mononuclear cell proliferation	14	1.5	0.011	0.28
GOTERM_BP_ALL	negative regulation of cell-cell adhesion	14	1.5	0.011	0.28
GOTERM_BP_ALL	microtubule polymerization	8	0.9	0.011	0.29
GOTERM_BP_ALL	regulation of DNA metabolic process	29	3.2	0.012	0.28
GOTERM_BP_ALL	positive regulation of intracellular protein transport	22	2.4	0.012	0.28
GOTERM_BP_ALL	positive regulation of transcription from RNA polymerase II promoter	67	7.3	0.012	0.28
GOTERM_BP_ALL	regulation of ubiquitin-protein transferase activity	13	1.4	0.012	0.28
GOTERM_BP_ALL	positive regulation of cell differentiation	56	6.1	0.012	0.29
GOTERM_BP_ALL	cellular metal ion homeostasis	36	3.9	0.012	0.3
GOTERM_BP_ALL	negative regulation of molecular function	70	7.7	0.013	0.3
GOTERM_BP_ALL	cytokine production	44	4.8	0.013	0.3
GOTERM_BP_ALL	regulation of catabolic process	37	4	0.013	0.3
GOTERM_BP_ALL	cellular response to interferon-gamma	14	1.5	0.013	0.3
GOTERM_BP_ALL	negative regulation of transferase activity	28	3.1	0.013	0.3
GOTERM_BP_ALL	regulation of cell proliferation	94	10.3	0.013	0.31
GOTERM_BP_ALL	negative regulation of cellular protein metabolic process	64	7	0.013	0.31
GOTERM_BP_ALL	establishment of cell polarity	11	1.2	0.013	0.31
GOTERM_BP_ALL	NIK/NF-kappaB signaling	12	1.3	0.013	0.31
GOTERM_BP_ALL	response to growth factor	44	4.8	0.014	0.31
GOTERM_BP_ALL	defense response to other organism	36	3.9	0.014	0.31
GOTERM_BP_ALL	regulation of immune effector process	26	2.8	0.014	0.31
GOTERM_BP_ALL	regulation of cellular amino acid metabolic process	8	0.9	0.014	0.32
GOTERM_BP_ALL	response to zinc ion	8	0.9	0.014	0.32
GOTERM_BP_ALL	interferon-gamma-mediated signaling pathway	10	1.1	0.014	0.32
GOTERM_BP_ALL	tissue homeostasis	18	2	0.014	0.32
GOTERM_BP_ALL	regulation of cellular protein metabolic process	135	14.8	0.015	0.33
GOTERM_BP_ALL	microtubule polymerization or depolymerization	10	1.1	0.015	0.33
GOTERM_BP_ALL	response to oxygen-containing compound	89	9.7	0.015	0.33
GOTERM_BP_ALL	regulation of protein transport	50	5.5	0.015	0.33
GOTERM_BP_ALL	negative regulation of metabolic process	144	15.7	0.016	0.34
GOTERM_BP_ALL	negative regulation of response to wounding	9	1	0.016	0.34
GOTERM_BP_ALL	regulation of leukocyte cell-cell adhesion	25	2.7	0.016	0.34
GOTERM_BP_ALL	activated T cell proliferation	7	0.8	0.016	0.34
GOTERM_BP_ALL	negative regulation of signaling	74	8.1	0.016	0.34
GOTERM_BP_ALL	positive regulation of leukocyte proliferation	14	1.5	0.016	0.34
GOTERM_BP_ALL	tumor necrosis factor-mediated signaling pathway	14	1.5	0.016	0.34
GOTERM_BP_ALL	negative regulation of inflammatory response	12	1.3	0.016	0.34
GOTERM_BP_ALL	positive regulation of ubiquitin protein ligase activity	10	1.1	0.016	0.34
GOTERM_BP_ALL	cellular ion homeostasis	41	4.5	0.016	0.34
GOTERM_BP_ALL	negative regulation of cellular component organization	43	4.7	0.016	0.34
GOTERM_BP_ALL	cellular chemical homeostasis	48	5.2	0.017	0.34
GOTERM_BP_ALL	establishment or maintenance of cell polarity	16	1.7	0.017	0.34
GOTERM_BP_ALL	cellular response to inorganic substance	15	1.6	0.017	0.35
GOTERM_BP_ALL	regulation of tyrosine phosphorylation of STAT protein	9	1	0.017	0.35
GOTERM_BP_ALL	activation of innate immune response	21	2.3	0.017	0.35
GOTERM_BP_ALL	semaphorin-plexin signaling pathway involved in axon guidance	4	0.4	0.017	0.35
GOTERM_BP_ALL	regulation of leukocyte migration	15	1.6	0.018	0.36
GOTERM_BP_ALL	positive regulation of biosynthetic process	104	11.4	0.018	0.36
GOTERM_BP_ALL	response to inorganic substance	34	3.7	0.018	0.36
GOTERM_BP_ALL	cellular response to growth factor stimulus	42	4.6	0.018	0.36
GOTERM_BP_ALL	immune response-activating cell surface receptor signaling pathway	28	3.1	0.018	0.36
GOTERM_BP_ALL	respiratory system development	18	2	0.018	0.36
GOTERM_BP_ALL	negative regulation of cell adhesion	19	2.1	0.018	0.36
GOTERM_BP_ALL	positive regulation of cell adhesion	29	3.2	0.019	0.36
GOTERM_BP_ALL	positive regulation of T cell proliferation	11	1.2	0.019	0.36
GOTERM_BP_ALL	regulation of intracellular transport	34	3.7	0.019	0.36
GOTERM_BP_ALL	regulation of cytokine production	40	4.4	0.019	0.36
GOTERM_BP_ALL	phosphorylation	128	14	0.019	0.37
GOTERM_BP_ALL	nucleotide metabolic process	45	4.9	0.019	0.37
GOTERM_BP_ALL	regulation of T cell differentiation	12	1.3	0.02	0.37
GOTERM_BP_ALL	regulation of tyrosine phosphorylation of Stat3 protein	7	0.8	0.02	0.37
GOTERM_BP_ALL	tyrosine phosphorylation of Stat3 protein	7	0.8	0.02	0.37
GOTERM_BP_ALL	regulation of cell cycle phase transition	26	2.8	0.02	0.37
GOTERM_BP_ALL	regulation of purine nucleotide metabolic process	18	2	0.02	0.37
GOTERM_BP_ALL	regulation of adaptive immune response	13	1.4	0.02	0.37
GOTERM_BP_ALL	positive regulation of cysteine-type endopeptidase activity	13	1.4	0.02	0.37
GOTERM_BP_ALL	cellular response to drug	9	1	0.02	0.37
GOTERM_BP_ALL	regulation of growth	44	4.8	0.02	0.37
GOTERM_BP_ALL	reactive oxygen species biosynthetic process	10	1.1	0.02	0.37
GOTERM_BP_ALL	negative regulation of cell communication	73	8	0.021	0.38
GOTERM_BP_ALL	organophosphate metabolic process	69	7.5	0.021	0.38
GOTERM_BP_ALL	positive regulation of intracellular transport	23	2.5	0.021	0.38
GOTERM_BP_ALL	regulation of endopeptidase activity	28	3.1	0.021	0.38
GOTERM_BP_ALL	transmembrane receptor protein serine/threonine kinase signaling pathway	25	2.7	0.021	0.38
GOTERM_BP_ALL	interleukin-1 production	9	1	0.021	0.38
GOTERM_BP_ALL	positive regulation of nucleobase-containing compound metabolic process	98	10.7	0.021	0.38
GOTERM_BP_ALL	positive regulation of cellular catabolic process	22	2.4	0.022	0.38
GOTERM_BP_ALL	negative regulation of blood coagulation	7	0.8	0.022	0.39
GOTERM_BP_ALL	negative regulation of hemostasis	7	0.8	0.022	0.39
GOTERM_BP_ALL	response to vitamin	10	1.1	0.022	0.38
GOTERM_BP_ALL	regulation of ubiquitin protein ligase activity	10	1.1	0.022	0.38
GOTERM_BP_ALL	semaphorin-plexin signaling pathway involved in neuron projection guidance	4	0.4	0.022	0.39
GOTERM_BP_ALL	regulation of metabolic process	324	35.4	0.022	0.38
GOTERM_BP_ALL	cell development	114	12.5	0.022	0.39
GOTERM_BP_ALL	negative regulation of homeostatic process	16	1.7	0.022	0.39
GOTERM_BP_ALL	regulation of intracellular signal transduction	101	11	0.022	0.38
GOTERM_BP_ALL	positive regulation of protein complex assembly	19	2.1	0.022	0.39
GOTERM_BP_ALL	response to copper ion	5	0.5	0.022	0.39
GOTERM_BP_ALL	cerebral cortex neuron differentiation	5	0.5	0.022	0.39
GOTERM_BP_ALL	regulation of ion transmembrane transport	29	3.2	0.023	0.39
GOTERM_BP_ALL	tyrosine phosphorylation of STAT protein	9	1	0.023	0.39
GOTERM_BP_ALL	nucleoside phosphate metabolic process	45	4.9	0.023	0.4
GOTERM_BP_ALL	negative regulation of protein phosphorylation	29	3.2	0.024	0.4
GOTERM_BP_ALL	negative regulation of wound healing	8	0.9	0.024	0.4
GOTERM_BP_ALL	immune response-activating signal transduction	35	3.8	0.024	0.4
GOTERM_BP_ALL	response to transition metal nanoparticle	13	1.4	0.025	0.41
GOTERM_BP_ALL	regulation of calcium ion transport into cytosol	10	1.1	0.025	0.41
GOTERM_BP_ALL	reactive nitrogen species metabolic process	9	1	0.025	0.41
GOTERM_BP_ALL	negative regulation of cell motility	19	2.1	0.025	0.41
GOTERM_BP_ALL	positive regulation of cellular biosynthetic process	101	11	0.025	0.41
GOTERM_BP_ALL	regulation of peptidase activity	29	3.2	0.025	0.41
GOTERM_BP_ALL	nucleoside metabolic process	30	3.3	0.026	0.42
GOTERM_BP_ALL	cation homeostasis	43	4.7	0.026	0.42
GOTERM_BP_ALL	cellular response to tumor necrosis factor	20	2.2	0.026	0.41
GOTERM_BP_ALL	interferon-gamma production	11	1.2	0.026	0.41
GOTERM_BP_ALL	positive regulation of cellular response to transforming growth factor beta stimulus	5	0.5	0.026	0.42
GOTERM_BP_ALL	positive regulation of transforming growth factor beta receptor signaling pathway	5	0.5	0.026	0.42
GOTERM_BP_ALL	antigen receptor-mediated signaling pathway	19	2.1	0.026	0.42
GOTERM_BP_ALL	response to abiotic stimulus	64	7	0.026	0.42
GOTERM_BP_ALL	regulation of nucleotide metabolic process	18	2	0.026	0.42
GOTERM_BP_ALL	T cell activation involved in immune response	10	1.1	0.026	0.42
GOTERM_BP_ALL	ion homeostasis	46	5	0.027	0.42
GOTERM_BP_ALL	lymphocyte activation involved in immune response	14	1.5	0.027	0.42
GOTERM_BP_ALL	positive regulation of protein modification process	70	7.7	0.027	0.42
GOTERM_BP_ALL	protein complex assembly	86	9.4	0.027	0.43
GOTERM_BP_ALL	protein complex biogenesis	86	9.4	0.028	0.43
GOTERM_BP_ALL	epithelial cell proliferation	26	2.8	0.028	0.43
GOTERM_BP_ALL	purine-containing compound metabolic process	39	4.3	0.028	0.43
GOTERM_BP_ALL	response to tumor necrosis factor	21	2.3	0.028	0.43
GOTERM_BP_ALL	negative regulation of cell migration	18	2	0.028	0.43
GOTERM_BP_ALL	positive regulation of cell proliferation	54	5.9	0.028	0.43
GOTERM_BP_ALL	metal ion homeostasis	38	4.2	0.029	0.43
GOTERM_BP_ALL	positive regulation of ubiquitin-protein ligase activity involved in regulation of mitotic cell cycle transition	9	1	0.029	0.43
GOTERM_BP_ALL	regulation of phosphorylation	83	9.1	0.029	0.43
GOTERM_BP_ALL	stimulatory C-type lectin receptor signaling pathway	11	1.2	0.029	0.43
GOTERM_BP_ALL	regulation of cell cycle process	40	4.4	0.029	0.43
GOTERM_BP_ALL	positive regulation of RNA metabolic process	84	9.2	0.029	0.44
GOTERM_BP_ALL	glycosyl compound metabolic process	31	3.4	0.029	0.44
GOTERM_BP_ALL	fatty acid metabolic process	27	3	0.029	0.44
GOTERM_BP_ALL	regulation of cell development	54	5.9	0.029	0.44
GOTERM_BP_ALL	homeostatic process	96	10.5	0.03	0.44
GOTERM_BP_ALL	negative regulation of protein modification process	39	4.3	0.03	0.44
GOTERM_BP_ALL	cellular response to copper ion	3	0.3	0.03	0.44
GOTERM_BP_ALL	regulation of interleukin-1 production	8	0.9	0.03	0.44
GOTERM_BP_ALL	negative regulation of autophagy	8	0.9	0.03	0.44
GOTERM_BP_ALL	intracellular protein transport	63	6.9	0.03	0.44
GOTERM_BP_ALL	mating	6	0.7	0.03	0.44
GOTERM_BP_ALL	endoderm development	9	1	0.031	0.44
GOTERM_BP_ALL	negative regulation of macromolecule metabolic process	131	14.3	0.031	0.44
GOTERM_BP_ALL	regulation of cell growth	29	3.2	0.031	0.45
GOTERM_BP_ALL	regulation of axonogenesis	15	1.6	0.031	0.45
GOTERM_BP_ALL	regulation of interleukin-1 beta production	7	0.8	0.031	0.45
GOTERM_BP_ALL	negative regulation of phosphorus metabolic process	37	4	0.031	0.45
GOTERM_BP_ALL	negative regulation of phosphate metabolic process	37	4	0.031	0.45
GOTERM_BP_ALL	protein transport	107	11.7	0.032	0.45
GOTERM_BP_ALL	innate immune response activating cell surface receptor signaling pathway	11	1.2	0.032	0.45
GOTERM_BP_ALL	cellular response to vitamin D	4	0.4	0.032	0.45
GOTERM_BP_ALL	positive regulation of microtubule polymerization	4	0.4	0.032	0.45
GOTERM_BP_ALL	response to toxic substance	17	1.9	0.034	0.47
GOTERM_BP_ALL	leukocyte activation	48	5.2	0.034	0.46
GOTERM_BP_ALL	establishment or maintenance of bipolar cell polarity	6	0.7	0.034	0.46
GOTERM_BP_ALL	establishment or maintenance of apical/basal cell polarity	6	0.7	0.034	0.46
GOTERM_BP_ALL	regulation of cyclic nucleotide metabolic process	14	1.5	0.034	0.46
GOTERM_BP_ALL	negative regulation of defense response	14	1.5	0.034	0.46
GOTERM_BP_ALL	regulation of chemotaxis	16	1.7	0.034	0.46
GOTERM_BP_ALL	regulation of transmembrane transport	29	3.2	0.034	0.46
GOTERM_BP_ALL	positive regulation of nucleic acid-templated transcription	80	8.7	0.034	0.47
GOTERM_BP_ALL	positive regulation of transcription, DNA-templated	80	8.7	0.034	0.47
GOTERM_BP_ALL	regulation of autophagy	21	2.3	0.035	0.47
GOTERM_BP_ALL	protein complex subunit organization	97	10.6	0.035	0.47
GOTERM_BP_ALL	positive regulation of adaptive immune response	9	1	0.035	0.47
GOTERM_BP_ALL	positive regulation of protein transport	32	3.5	0.035	0.47
GOTERM_BP_ALL	positive regulation of interferon-gamma production	8	0.9	0.035	0.47
GOTERM_BP_ALL	positive regulation of hydrolase activity	57	6.2	0.035	0.47
GOTERM_BP_ALL	inorganic ion homeostasis	43	4.7	0.035	0.47
GOTERM_BP_ALL	tissue morphogenesis	41	4.5	0.035	0.47
GOTERM_BP_ALL	regulation of protein kinase activity	47	5.1	0.036	0.47
GOTERM_BP_ALL	T cell differentiation	17	1.9	0.036	0.48
GOTERM_BP_ALL	regulation of lymphocyte differentiation	13	1.4	0.037	0.48
GOTERM_BP_ALL	protein phosphorylation	106	11.6	0.037	0.48
GOTERM_BP_ALL	regulation of microtubule polymerization or depolymerization	7	0.8	0.037	0.48
GOTERM_BP_ALL	pyrimidine nucleoside metabolic process	7	0.8	0.037	0.48
GOTERM_BP_ALL	regulation of kinase activity	50	5.5	0.037	0.48
GOTERM_BP_ALL	regulation of cellular metabolic process	305	33.3	0.037	0.48
GOTERM_BP_ALL	negative regulation of ubiquitin-protein transferase activity	9	1	0.037	0.48
GOTERM_BP_ALL	cell morphogenesis involved in differentiation	48	5.2	0.038	0.49
GOTERM_BP_ALL	nitric oxide biosynthetic process	8	0.9	0.038	0.49
GOTERM_BP_ALL	reactive oxygen species metabolic process	18	2	0.038	0.49
GOTERM_BP_ALL	negative regulation of phosphorylation	30	3.3	0.038	0.49
GOTERM_BP_ALL	positive regulation of establishment of protein localization	35	3.8	0.039	0.49
GOTERM_BP_ALL	regulation of lymphocyte activation	29	3.2	0.039	0.49
GOTERM_BP_ALL	organophosphate biosynthetic process	38	4.2	0.039	0.49
GOTERM_BP_ALL	response to metal ion	23	2.5	0.04	0.5
GOTERM_BP_ALL	positive regulation of protein catabolic process	20	2.2	0.04	0.5
GOTERM_BP_ALL	single-organism metabolic process	217	23.7	0.041	0.5
GOTERM_BP_ALL	cellular divalent inorganic cation homeostasis	29	3.2	0.041	0.5
GOTERM_BP_ALL	response to herbicide	3	0.3	0.041	0.5
GOTERM_BP_ALL	negative regulation of tyrosine phosphorylation of Stat3 protein	3	0.3	0.041	0.5
GOTERM_BP_ALL	protein sulfation	3	0.3	0.041	0.5
GOTERM_BP_ALL	establishment of protein localization	114	12.5	0.041	0.51
GOTERM_BP_ALL	regulation of cytosolic calcium ion concentration	22	2.4	0.042	0.51
GOTERM_BP_ALL	monovalent inorganic cation homeostasis	13	1.4	0.042	0.51
GOTERM_BP_ALL	response to glucocorticoid	13	1.4	0.042	0.51
GOTERM_BP_ALL	transforming growth factor beta receptor signaling pathway	14	1.5	0.042	0.51
GOTERM_BP_ALL	regulation of interferon-gamma production	10	1.1	0.043	0.51
GOTERM_BP_ALL	motor neuron axon guidance	5	0.5	0.043	0.51
GOTERM_BP_ALL	regulation of microtubule polymerization	5	0.5	0.043	0.51
GOTERM_BP_ALL	anoikis	5	0.5	0.043	0.51
GOTERM_BP_ALL	regulation of homeostatic process	31	3.4	0.044	0.52
GOTERM_BP_ALL	positive regulation of cellular protein localization	26	2.8	0.044	0.52
GOTERM_BP_ALL	monocarboxylic acid metabolic process	37	4	0.044	0.52
GOTERM_BP_ALL	positive regulation of macromolecule biosynthetic process	92	10.1	0.044	0.52
GOTERM_BP_ALL	Fc receptor signaling pathway	19	2.1	0.044	0.52
GOTERM_BP_ALL	innate immune response-activating signal transduction	19	2.1	0.044	0.52
GOTERM_BP_ALL	nucleoside catabolic process	6	0.7	0.045	0.53
GOTERM_BP_ALL	protein exit from endoplasmic reticulum	6	0.7	0.045	0.53
GOTERM_BP_ALL	small molecule biosynthetic process	33	3.6	0.045	0.53
GOTERM_BP_ALL	regionalization	24	2.6	0.045	0.53
GOTERM_BP_ALL	regulation of tolerance induction	4	0.4	0.045	0.53
GOTERM_BP_ALL	negative regulation of anoikis	4	0.4	0.045	0.53
GOTERM_BP_ALL	xenobiotic metabolic process	10	1.1	0.045	0.52
GOTERM_BP_ALL	leukocyte chemotaxis	16	1.7	0.046	0.53
GOTERM_BP_ALL	bone remodeling	8	0.9	0.046	0.53
GOTERM_BP_ALL	nucleotide biosynthetic process	23	2.5	0.047	0.53
GOTERM_BP_ALL	endothelial cell proliferation	11	1.2	0.047	0.53
GOTERM_BP_ALL	signal transduction by protein phosphorylation	54	5.9	0.047	0.54
GOTERM_BP_ALL	positive regulation of RNA biosynthetic process	80	8.7	0.048	0.54
GOTERM_BP_ALL	regulation of protein modification process	95	10.4	0.048	0.54
GOTERM_BP_ALL	regulation of transmembrane receptor protein serine/threonine kinase signaling pathway	17	1.9	0.049	0.55
GOTERM_BP_ALL	fat-soluble vitamin metabolic process	6	0.7	0.049	0.55
GOTERM_BP_ALL	unsaturated fatty acid metabolic process	11	1.2	0.049	0.55
GOTERM_BP_ALL	regulation of endothelial cell migration	11	1.2	0.049	0.55
GOTERM_BP_ALL	positive regulation of phosphorus metabolic process	63	6.9	0.049	0.55
GOTERM_BP_ALL	positive regulation of phosphate metabolic process	63	6.9	0.049	0.55
GOTERM_BP_ALL	response to lipid	53	5.8	0.049	0.55
GOTERM_BP_ALL	nitric oxide metabolic process	8	0.9	0.05	0.55
GOTERM_BP_ALL	positive regulation of leukocyte differentiation	12	1.3	0.05	0.55
GOTERM_BP_ALL	cellular response to BMP stimulus	13	1.4	0.05	0.55
GOTERM_BP_ALL	response to BMP	13	1.4	0.05	0.55
GOTERM_BP_ALL	regulation of cellular response to transforming growth factor beta stimulus	10	1.1	0.05	0.55
GOTERM_BP_ALL	regulation of transforming growth factor beta receptor signaling pathway	10	1.1	0.05	0.55
GOTERM_BP_ALL	cellular response to transforming growth factor beta stimulus	17	1.9	0.05	0.55
GOTERM_BP_ALL	T cell differentiation involved in immune response	7	0.8	0.05	0.55
GOTERM_BP_ALL	nucleoside phosphate biosynthetic process	23	2.5	0.051	0.55
GOTERM_BP_ALL	cellular process	758	82.8	0.051	0.55
GOTERM_BP_ALL	regulation of protein phosphorylation	76	8.3	0.051	0.55
GOTERM_BP_ALL	negative regulation of DNA metabolic process	11	1.2	0.052	0.55
GOTERM_BP_ALL	regulation of cell projection assembly	14	1.5	0.052	0.55
GOTERM_BP_ALL	positive regulation of cell morphogenesis involved in differentiation	14	1.5	0.052	0.55
GOTERM_BP_ALL	positive regulation of cytokine production	27	3	0.052	0.55
GOTERM_BP_ALL	negative regulation of T cell apoptotic process	4	0.4	0.052	0.56
GOTERM_BP_ALL	response to vitamin A	4	0.4	0.052	0.56
GOTERM_BP_ALL	potassium ion homeostasis	4	0.4	0.052	0.56
GOTERM_BP_ALL	positive regulation of cell-cell adhesion	19	2.1	0.053	0.56
GOTERM_BP_ALL	dorsal/ventral pattern formation	10	1.1	0.053	0.56
GOTERM_BP_ALL	regulation of protein targeting	22	2.4	0.053	0.56
GOTERM_BP_ALL	negative regulation of ubiquitin-protein ligase activity involved in mitotic cell cycle	8	0.9	0.053	0.56
GOTERM_BP_ALL	regulation of endodeoxyribonuclease activity	3	0.3	0.053	0.56
GOTERM_BP_ALL	regulation of endocytic recycling	3	0.3	0.053	0.56
GOTERM_BP_ALL	regulation of T-helper 17 cell differentiation	3	0.3	0.053	0.56
GOTERM_BP_ALL	negative regulation of immune system process	27	3	0.053	0.56
GOTERM_BP_ALL	regulation of T cell receptor signaling pathway	5	0.5	0.053	0.56
GOTERM_BP_ALL	ribonucleoside catabolic process	5	0.5	0.053	0.56
GOTERM_BP_ALL	regulation of bone remodeling	6	0.7	0.053	0.56
GOTERM_BP_ALL	organonitrogen compound metabolic process	123	13.4	0.054	0.56
GOTERM_BP_ALL	cell-cell signaling	87	9.5	0.054	0.56
GOTERM_BP_ALL	response to transforming growth factor beta	17	1.9	0.054	0.56
GOTERM_BP_ALL	regulation of adaptive immune response based on somatic recombination of immune receptors built from immunoglobulin superfamily domains	11	1.2	0.054	0.56
GOTERM_BP_ALL	regulation of DNA replication	11	1.2	0.054	0.56
GOTERM_BP_ALL	interleukin-1 beta production	7	0.8	0.054	0.56
GOTERM_BP_ALL	regulation of JAK-STAT cascade	13	1.4	0.054	0.56
GOTERM_BP_ALL	regulation of STAT cascade	13	1.4	0.054	0.56
GOTERM_BP_ALL	dephosphorylation	29	3.2	0.054	0.56
GOTERM_BP_ALL	lymphocyte activation	41	4.5	0.054	0.56
GOTERM_BP_ALL	positive regulation of NF-kappaB transcription factor activity	12	1.3	0.054	0.56
GOTERM_BP_ALL	cellular macromolecule localization	92	10.1	0.055	0.56
GOTERM_BP_ALL	positive regulation of protein ubiquitination	15	1.6	0.055	0.56
GOTERM_BP_ALL	regulation of ion homeostasis	16	1.7	0.055	0.56
GOTERM_BP_ALL	second-messenger-mediated signaling	18	2	0.056	0.57
GOTERM_BP_ALL	epithelium development	63	6.9	0.056	0.57
GOTERM_BP_ALL	regulation of ubiquitin-protein ligase activity involved in mitotic cell cycle	8	0.9	0.056	0.57
GOTERM_BP_ALL	regulation of alpha-beta T cell activation	8	0.9	0.056	0.57
GOTERM_BP_ALL	lymphocyte apoptotic process	8	0.9	0.056	0.57
GOTERM_BP_ALL	negative regulation of epithelial cell proliferation	11	1.2	0.057	0.57
GOTERM_BP_ALL	organic acid metabolic process	55	6	0.057	0.57
GOTERM_BP_ALL	regulation of lymphocyte apoptotic process	7	0.8	0.058	0.58
GOTERM_BP_ALL	cellular response to xenobiotic stimulus	10	1.1	0.058	0.58
GOTERM_BP_ALL	cellular component organization	315	34.4	0.058	0.58
GOTERM_BP_ALL	positive regulation of cytosolic calcium ion concentration	20	2.2	0.059	0.58
GOTERM_BP_ALL	positive regulation of cell cycle	24	2.6	0.059	0.58
GOTERM_BP_ALL	protein localization	134	14.6	0.059	0.58
GOTERM_BP_ALL	positive regulation of cysteine-type endopeptidase activity involved in apoptotic process	11	1.2	0.059	0.58
GOTERM_BP_ALL	water-soluble vitamin metabolic process	9	1	0.06	0.58
GOTERM_BP_ALL	cellular calcium ion homeostasis	27	3	0.06	0.58
GOTERM_BP_ALL	negative regulation of ubiquitin protein ligase activity	8	0.9	0.06	0.58
GOTERM_BP_ALL	regulation of release of sequestered calcium ion into cytosol	8	0.9	0.06	0.58
GOTERM_BP_ALL	positive regulation of microtubule polymerization or depolymerization	4	0.4	0.06	0.58
GOTERM_BP_ALL	negative regulation of tissue remodeling	4	0.4	0.06	0.58
GOTERM_BP_ALL	regulation of anatomical structure size	32	3.5	0.06	0.58
GOTERM_BP_ALL	regulation of cell activation	33	3.6	0.06	0.58
GOTERM_BP_ALL	regulation of extent of cell growth	10	1.1	0.061	0.59
GOTERM_BP_ALL	interleukin-2 production	7	0.8	0.062	0.59
GOTERM_BP_ALL	regulation of cellular catabolic process	26	2.8	0.063	0.59
GOTERM_BP_ALL	negative regulation of cell development	22	2.4	0.063	0.59
GOTERM_BP_ALL	regulation of coagulation	9	1	0.063	0.59
GOTERM_BP_ALL	negative regulation of T cell activation	9	1	0.063	0.59
GOTERM_BP_ALL	regulation of neuron projection development	28	3.1	0.063	0.59
GOTERM_BP_ALL	tissue migration	18	2	0.063	0.59
GOTERM_BP_ALL	monocarboxylic acid biosynthetic process	15	1.6	0.063	0.59
GOTERM_BP_ALL	regulation of cellular amine metabolic process	8	0.9	0.063	0.59
GOTERM_BP_ALL	regulation of leukocyte activation	31	3.4	0.064	0.6
GOTERM_BP_ALL	very long-chain fatty acid metabolic process	5	0.5	0.065	0.6
GOTERM_BP_ALL	regulation of vacuolar transport	5	0.5	0.065	0.6
GOTERM_BP_ALL	negative regulation of endothelial cell proliferation	5	0.5	0.065	0.6
GOTERM_BP_ALL	detection of abiotic stimulus	11	1.2	0.065	0.6
GOTERM_BP_ALL	regulation of I-kappaB kinase/NF-kappaB signaling	18	2	0.065	0.6
GOTERM_BP_ALL	regulation of natural killer cell proliferation	3	0.3	0.066	0.6
GOTERM_BP_ALL	positive regulation of phosphorylation of RNA polymerase II C-terminal domain	3	0.3	0.066	0.6
GOTERM_BP_ALL	negative regulation of tyrosine phosphorylation of STAT protein	3	0.3	0.066	0.6
GOTERM_BP_ALL	cytidine catabolic process	3	0.3	0.066	0.6
GOTERM_BP_ALL	cytidine deamination	3	0.3	0.066	0.6
GOTERM_BP_ALL	cytidine metabolic process	3	0.3	0.066	0.6
GOTERM_BP_ALL	divalent inorganic cation homeostasis	29	3.2	0.066	0.6
GOTERM_BP_ALL	endothelial cell migration	13	1.4	0.066	0.6
GOTERM_BP_ALL	regulation of axon extension	9	1	0.066	0.6
GOTERM_BP_ALL	long-chain fatty acid metabolic process	9	1	0.066	0.6
GOTERM_BP_ALL	detection of light stimulus	7	0.8	0.066	0.6
GOTERM_BP_ALL	single-organism biosynthetic process	77	8.4	0.067	0.61
GOTERM_BP_ALL	positive regulation of adaptive immune response based on somatic recombination of immune receptors built from immunoglobulin superfamily domains	8	0.9	0.067	0.61
GOTERM_BP_ALL	negative regulation of angiogenesis	8	0.9	0.067	0.61
GOTERM_BP_ALL	negative regulation of cell growth	14	1.5	0.067	0.61
GOTERM_BP_ALL	JAK-STAT cascade	14	1.5	0.067	0.61
GOTERM_BP_ALL	positive regulation of developmental process	64	7	0.068	0.61
GOTERM_BP_ALL	macromolecular complex assembly	96	10.5	0.068	0.61
GOTERM_BP_ALL	cellular response to external stimulus	19	2.1	0.069	0.61
GOTERM_BP_ALL	membrane depolarization	9	1	0.07	0.62
GOTERM_BP_ALL	positive regulation of protein ubiquitination involved in ubiquitin-dependent protein catabolic process	9	1	0.07	0.62
GOTERM_BP_ALL	cellular protein localization	90	9.8	0.07	0.62
GOTERM_BP_ALL	carboxylic acid metabolic process	50	5.5	0.071	0.62
GOTERM_BP_ALL	pattern specification process	29	3.2	0.071	0.62
GOTERM_BP_ALL	autophagy	28	3.1	0.071	0.62
GOTERM_BP_ALL	embryonic skeletal system development	11	1.2	0.071	0.62
GOTERM_BP_ALL	positive regulation of cyclic nucleotide metabolic process	10	1.1	0.071	0.62
GOTERM_BP_ALL	Wnt signaling pathway, planar cell polarity pathway	10	1.1	0.071	0.62
GOTERM_BP_ALL	negative regulation of DNA biosynthetic process	5	0.5	0.071	0.62
GOTERM_BP_ALL	regulation of mitotic cell cycle	32	3.5	0.071	0.62
GOTERM_BP_ALL	cellular component organization or biogenesis	321	35.1	0.072	0.62
GOTERM_BP_ALL	protein import	23	2.5	0.072	0.62
GOTERM_BP_ALL	regulation of cell size	14	1.5	0.072	0.62
GOTERM_BP_ALL	regulation of transcription from RNA polymerase II promoter	102	11.1	0.073	0.62
GOTERM_BP_ALL	negative regulation of cell differentiation	40	4.4	0.073	0.62
GOTERM_BP_ALL	apical junction assembly	6	0.7	0.073	0.62
GOTERM_BP_ALL	glycosyl compound catabolic process	6	0.7	0.073	0.62
GOTERM_BP_ALL	regulation of purine nucleotide biosynthetic process	12	1.3	0.073	0.62
GOTERM_BP_ALL	purine nucleotide metabolic process	35	3.8	0.073	0.62
GOTERM_BP_ALL	regulation of macromolecule metabolic process	299	32.7	0.074	0.63
GOTERM_BP_ALL	amine metabolic process	11	1.2	0.074	0.63
GOTERM_BP_ALL	negative regulation of blood vessel morphogenesis	8	0.9	0.075	0.63
GOTERM_BP_ALL	muscle contraction	23	2.5	0.075	0.63
GOTERM_BP_ALL	cellular macromolecular complex assembly	59	6.4	0.075	0.63
GOTERM_BP_ALL	ribonucleoside metabolic process	26	2.8	0.076	0.63
GOTERM_BP_ALL	regulation of nucleotide biosynthetic process	12	1.3	0.076	0.63
GOTERM_BP_ALL	organic acid biosynthetic process	20	2.2	0.076	0.63
GOTERM_BP_ALL	ectoderm development	4	0.4	0.077	0.64
GOTERM_BP_ALL	RNA replication	4	0.4	0.077	0.64
GOTERM_BP_ALL	reflex	4	0.4	0.077	0.64
GOTERM_BP_ALL	viral RNA genome replication	4	0.4	0.077	0.64
GOTERM_BP_ALL	pyrimidine nucleoside catabolic process	4	0.4	0.077	0.64
GOTERM_BP_ALL	response to corticosteroid	13	1.4	0.077	0.64
GOTERM_BP_ALL	regulation of cellular ketone metabolic process	13	1.4	0.077	0.64
GOTERM_BP_ALL	positive regulation of leukocyte migration	10	1.1	0.078	0.64
GOTERM_BP_ALL	neuron development	57	6.2	0.078	0.64
GOTERM_BP_ALL	response to endogenous stimulus	87	9.5	0.078	0.64
GOTERM_BP_ALL	embryonic digestive tract development	5	0.5	0.078	0.64
GOTERM_BP_ALL	interleukin-1 beta secretion	5	0.5	0.078	0.64
GOTERM_BP_ALL	locomotory behavior	15	1.6	0.078	0.64
GOTERM_BP_ALL	regulation of leukocyte differentiation	18	2	0.078	0.64
GOTERM_BP_ALL	mitotic cell cycle phase transition	33	3.6	0.078	0.64
GOTERM_BP_ALL	intracellular pH reduction	6	0.7	0.078	0.64
GOTERM_BP_ALL	oxoacid metabolic process	50	5.5	0.079	0.64
GOTERM_BP_ALL	muscle system process	27	3	0.079	0.64
GOTERM_BP_ALL	calcium ion homeostasis	27	3	0.079	0.64
GOTERM_BP_ALL	protein-DNA complex subunit organization	19	2.1	0.079	0.64
GOTERM_BP_ALL	carboxylic acid biosynthetic process	19	2.1	0.079	0.64
GOTERM_BP_ALL	histamine secretion	3	0.3	0.08	0.64
GOTERM_BP_ALL	disaccharide metabolic process	3	0.3	0.08	0.64
GOTERM_BP_ALL	negative regulation of transposition	3	0.3	0.08	0.64
GOTERM_BP_ALL	positive regulation of protein exit from endoplasmic reticulum	3	0.3	0.08	0.64
GOTERM_BP_ALL	regulation of transposition	3	0.3	0.08	0.64
GOTERM_BP_ALL	regulation of phosphorylation of RNA polymerase II C-terminal domain	3	0.3	0.08	0.64
GOTERM_BP_ALL	dichotomous subdivision of an epithelial terminal unit	3	0.3	0.08	0.64
GOTERM_BP_ALL	regulation of T-helper 17 type immune response	3	0.3	0.08	0.64
GOTERM_BP_ALL	positive regulation of T cell activation	16	1.7	0.08	0.64
GOTERM_BP_ALL	negative regulation of cell activation	13	1.4	0.08	0.64
GOTERM_BP_ALL	STAT cascade	14	1.5	0.08	0.64
GOTERM_BP_ALL	anatomical structure homeostasis	24	2.6	0.081	0.65
GOTERM_BP_ALL	regulation of establishment of planar polarity	10	1.1	0.081	0.65
GOTERM_BP_ALL	regulation of protein catabolic process	25	2.7	0.082	0.65
GOTERM_BP_ALL	epithelial cell migration	17	1.9	0.082	0.65
GOTERM_BP_ALL	cellular component assembly	141	15.4	0.082	0.65
GOTERM_BP_ALL	anaphase-promoting complex-dependent catabolic process	8	0.9	0.084	0.65
GOTERM_BP_ALL	pH reduction	6	0.7	0.084	0.66
GOTERM_BP_ALL	cellular component morphogenesis	75	8.2	0.084	0.66
GOTERM_BP_ALL	regulation of primary metabolic process	297	32.5	0.085	0.66
GOTERM_BP_ALL	endothelium development	10	1.1	0.085	0.66
GOTERM_BP_ALL	response to xenobiotic stimulus	10	1.1	0.085	0.66
GOTERM_BP_ALL	regulation of blood circulation	21	2.3	0.085	0.66
GOTERM_BP_ALL	regulation of epithelial cell proliferation	21	2.3	0.085	0.66
GOTERM_BP_ALL	chemical homeostasis	61	6.7	0.085	0.66
GOTERM_BP_ALL	regulation of cellular component size	24	2.6	0.085	0.66
GOTERM_BP_ALL	morphogenesis of a branching structure	15	1.6	0.086	0.66
GOTERM_BP_ALL	osteoblast differentiation	15	1.6	0.086	0.66
GOTERM_BP_ALL	regulation of antigen processing and presentation	4	0.4	0.086	0.66
GOTERM_BP_ALL	positive regulation of interleukin-1 beta secretion	4	0.4	0.086	0.66
GOTERM_BP_ALL	vitamin biosynthetic process	4	0.4	0.086	0.66
GOTERM_BP_ALL	cellular protein complex assembly	36	3.9	0.086	0.66
GOTERM_BP_ALL	cell projection organization	74	8.1	0.087	0.66
GOTERM_BP_ALL	renal system development	20	2.2	0.087	0.66
GOTERM_BP_ALL	purine ribonucleotide metabolic process	33	3.6	0.088	0.66
GOTERM_BP_ALL	negative regulation of leukocyte cell-cell adhesion	9	1	0.089	0.67
GOTERM_BP_ALL	epithelium migration	17	1.9	0.089	0.67
GOTERM_BP_ALL	regulation of cell cycle	57	6.2	0.089	0.67
GOTERM_BP_ALL	response to lipopolysaccharide	21	2.3	0.089	0.67
GOTERM_BP_ALL	ameboidal-type cell migration	22	2.4	0.09	0.67
GOTERM_BP_ALL	urogenital system development	22	2.4	0.09	0.67
GOTERM_BP_ALL	arachidonic acid metabolic process	6	0.7	0.09	0.67
GOTERM_BP_ALL	alpha-beta T cell activation involved in immune response	6	0.7	0.09	0.67
GOTERM_BP_ALL	alpha-beta T cell differentiation involved in immune response	6	0.7	0.09	0.67
GOTERM_BP_ALL	single organism reproductive process	70	7.7	0.09	0.67
GOTERM_BP_ALL	regulation of cAMP metabolic process	11	1.2	0.091	0.67
GOTERM_BP_ALL	positive regulation of response to external stimulus	19	2.1	0.091	0.67
GOTERM_BP_ALL	kidney development	19	2.1	0.091	0.67
GOTERM_BP_ALL	regulation of CD4-positive, alpha-beta T cell differentiation	5	0.5	0.092	0.67
GOTERM_BP_ALL	regulation of protein oligomerization	5	0.5	0.092	0.67
GOTERM_BP_ALL	positive regulation of cyclin-dependent protein serine/threonine kinase activity	5	0.5	0.092	0.67
GOTERM_BP_ALL	positive regulation of hemopoiesis	13	1.4	0.092	0.68
GOTERM_BP_ALL	regulation of metal ion transport	22	2.4	0.092	0.68
GOTERM_BP_ALL	cellular transition metal ion homeostasis	8	0.9	0.093	0.68
GOTERM_BP_ALL	regulation of pH	9	1	0.093	0.68
GOTERM_BP_ALL	chlorinated hydrocarbon metabolic process	2	0.2	0.093	0.68
GOTERM_BP_ALL	negative regulation of RNA polymerase II transcriptional preinitiation complex assembly	2	0.2	0.093	0.68
GOTERM_BP_ALL	regulation of early endosome to recycling endosome transport	2	0.2	0.093	0.68
GOTERM_BP_ALL	halogenated hydrocarbon metabolic process	2	0.2	0.093	0.68
GOTERM_BP_ALL	positive regulation of cell projection organization	21	2.3	0.094	0.68
GOTERM_BP_ALL	positive regulation of kinase activity	32	3.5	0.094	0.68
GOTERM_BP_ALL	positive regulation of protein modification by small protein conjugation or removal	15	1.6	0.094	0.68
GOTERM_BP_ALL	regulation of heart contraction	17	1.9	0.094	0.68
GOTERM_BP_ALL	histamine transport	3	0.3	0.095	0.68
GOTERM_BP_ALL	L-ascorbic acid metabolic process	3	0.3	0.095	0.68
GOTERM_BP_ALL	positive regulation of tyrosine phosphorylation of Stat1 protein	3	0.3	0.095	0.68
GOTERM_BP_ALL	terpenoid biosynthetic process	3	0.3	0.095	0.68
GOTERM_BP_ALL	NLRP3 inflammasome complex assembly	3	0.3	0.095	0.68
GOTERM_BP_ALL	pyrimidine ribonucleoside catabolic process	3	0.3	0.095	0.68
GOTERM_BP_ALL	branching morphogenesis of an epithelial tube	12	1.3	0.095	0.68
GOTERM_BP_ALL	calcium-mediated signaling	12	1.3	0.095	0.68
GOTERM_BP_ALL	positive regulation of cell cycle process	18	2	0.095	0.68
GOTERM_BP_ALL	establishment of epithelial cell polarity	4	0.4	0.095	0.68
GOTERM_BP_ALL	endocardial cushion formation	4	0.4	0.095	0.68
GOTERM_BP_ALL	cellular response to vitamin	4	0.4	0.095	0.68
GOTERM_BP_ALL	positive regulation of interleukin-1 secretion	4	0.4	0.095	0.68
GOTERM_BP_ALL	regulation of receptor recycling	4	0.4	0.095	0.68
GOTERM_BP_ALL	microtubule-based process	38	4.2	0.095	0.68
GOTERM_BP_ALL	regulation of cytokinesis	7	0.8	0.095	0.68
GOTERM_BP_ALL	reproductive process	77	8.4	0.096	0.68
GOTERM_BP_ALL	purine nucleoside metabolic process	24	2.6	0.096	0.68
GOTERM_BP_ALL	blood circulation	32	3.5	0.096	0.68
GOTERM_BP_ALL	regulation of alpha-beta T cell differentiation	6	0.7	0.096	0.68
GOTERM_BP_ALL	regulation of interleukin-12 production	6	0.7	0.096	0.68
GOTERM_BP_ALL	positive regulation of protein polymerization	10	1.1	0.096	0.68
GOTERM_BP_ALL	alpha-beta T cell activation	10	1.1	0.096	0.68
GOTERM_BP_ALL	response to bacterium	34	3.7	0.097	0.68
GOTERM_BP_ALL	negative regulation of biosynthetic process	84	9.2	0.097	0.68
GOTERM_BP_ALL	pyrimidine-containing compound metabolic process	8	0.9	0.097	0.68
GOTERM_BP_ALL	epithelial cell differentiation	35	3.8	0.098	0.68
GOTERM_BP_ALL	macromolecular complex subunit organization	132	14.4	0.098	0.68
GOTERM_BP_ALL	positive regulation of nucleotide metabolic process	11	1.2	0.098	0.68
GOTERM_BP_ALL	positive regulation of purine nucleotide metabolic process	11	1.2	0.098	0.68
GOTERM_BP_ALL	cytokine secretion	13	1.4	0.098	0.69
GOTERM_BP_ALL	positive regulation of protein kinase activity	30	3.3	0.099	0.68
GOTERM_BP_ALL	positive regulation of interleukin-1 production	5	0.5	0.099	0.69
